# Supplementary material for: Design of an experimental study of high through-plane thermal conductivity hybrid epoxy composite insulation with superior dielectric strength
Source: Royal Society of Chemistry journal article supplement (doi:10.1039/d2ma00592a), 2022-01-01
Supplement: d2ma00592a1.pdf [file d2ma00592a1.pdf]

## Supplementary information

Table S1. Backward elimination of terms of regression for Mixtures of thermal conductivity versus  $X_1$  (amount of epoxy resin, wt.%),  $X_2$  (amount of talc, wt.%),  $X_3$  (amount of BN cluster particles, wt.%), and  $X_4$  (amount of ZnO, wt.%)

|                 | -----Step 1----- |           | -----Step 2----- |           | -----Step 3----- |           | -----Step 4----- |           | -----Step 5----- |           |
|-----------------|------------------|-----------|------------------|-----------|------------------|-----------|------------------|-----------|------------------|-----------|
|                 | Coef             | P-Value   |
| $X_1$           | 1.193            | *         | 1.119            | *         | 1.184            | *         | 0.905            | *         | 0.353            | *         |
| $X_2$           | 7.03             | *         | 7.01             | *         | 7.40             | *         | 4.35             | *         | 0.866            | *         |
| $X_3$           | 16.66            | *         | 16.59            | *         | 16.04            | *         | 16.19            | *         | 16.16            | *         |
| $X_4$           | 4.89             | *         | 0.87             | *         | 0.28             | *         | -0.958           | *         | 0.073            | *         |
| $X_1 \cdot X_2$ | -11.65           | 0.058     | -11.39           | 0.069     | -12.19           | 0.059     | -6.93            | 0.198     |                  |           |
| $X_1 \cdot X_3$ | -15.98           | 0.006     | -15.47           | 0.008     | -14.96           | 0.011     | -15.74           | 0.010     | -14.93           | 0.014     |
| $X_1 \cdot X_4$ | -6.58            | 0.191     |                  |           |                  |           |                  |           |                  |           |
| $X_2 \cdot X_3$ | -21.38           | 0.002     | -22.08           | 0.002     | -21.74           | 0.003     | -16.48           | 0.006     | -13.91           | 0.012     |
| $X_2 \cdot X_4$ | -9.92            | 0.099     | -9.66            | 0.116     | -9.40            | 0.138     |                  |           |                  |           |
| $X_3 \cdot X_4$ | -7.71            | 0.131     | -7.20            | 0.166     |                  |           |                  |           |                  |           |
| S               |                  | 0.0235346 |                  | 0.0243499 |                  | 0.0253356 |                  | 0.0265574 |                  | 0.0272224 |
| R-sq            |                  | 98.97%    |                  | 98.81%    |                  | 98.61%    |                  | 98.37%    |                  | 98.17%    |
| R-sq(adj)       |                  | 98.21%    |                  | 98.08%    |                  | 97.92%    |                  | 97.71%    |                  | 97.60%    |
| R-sq(pred)      |                  | 93.89%    |                  | 93.29%    |                  | 92.81%    |                  | 91.69%    |                  | 91.07%    |
| Mallows'        |                  | 10.00     |                  | 9.92      |                  | 10.22     |                  | 11.10     |                  | 11.41     |
| Cp              |                  |           |                  |           |                  |           |                  |           |                  |           |

$\alpha$  to remove = 0.1
